# Supplementary material for: Comparison of Medicaid Reimbursements for Psychiatrists and Primary Care Physicians
Source: Atypon-hosted journal article supplement (doi:10.1176/appi.ps.202000062), 2020-07-24
Supplement: appi.ps.202000062.ds001.pdf [file appi.ps.202000062.ds001.pdf]

**Online Supplement**

Top 10 procedure codes used by psychiatrists and primary care physicians for claims with primary behavioral health conditions, 2014

| Georgia                        | Idaho | Michigan | Minnesota | Mississippi | New Jersey | Pennsylvania | South Dakota | Vermont | West Virginia | Wyoming |
|--------------------------------|-------|----------|-----------|-------------|------------|--------------|--------------|---------|---------------|---------|
| <i>Psychiatrists</i>           |       |          |           |             |            |              |              |         |               |         |
| 99213                          | 99213 | 99213    | 99214     | 99213       | 99213      | 99211        | 99213        | H2017   | 99213         | 99214   |
| 99214                          | 99214 | 90834    | 99213     | 99214       | 99214      | 99213        | 99214        | J3490   | 90834         | 99213   |
| 90833                          | 99212 | 99214    | 99215     | 90833       | 90833      | 99214        | 90833        | T1017   | 99212         | H2013   |
| 90832                          | 96110 | 90837    | H2017     | 90791       | 90834      | 99205        | 90792        | H2020   | 99214         | 90833   |
| 90792                          | 90460 | T1017    | 90833     | 90792       | 99212      | 90832        | 99212        | 99214   | 90853         | Q3014   |
| 90785                          | 99215 | 90791    | 90837     | 99307       | 90792      | 99212        | 99205        | 99213   | 90792         | 90785   |
| 99215                          | 90834 | 90792    | 90792     | 90785       | 90847      | 99309        | 90836        | H2014   | G0434         | 99212   |
| 90847                          | 99203 | H2030    | 90834     | 90853       | 90836      | 99203        | 99215        | H0020   | 90791         | 90792   |
| 90836                          | 99204 | 99212    | 99205     | 90847       | 90791      | 99308        | 99334        | 90837   | G0431         | H2019   |
| 90837                          | 99211 | 90832    | 90832     | 99212       | 99309      | 90853        | 90834        | H0005   | 81005         | 90837   |
| <i>Primary Care Physicians</i> |       |          |           |             |            |              |              |         |               |         |
| 99213                          | 99213 | 99214    | 99214     | 99213       | Y9434      | 99213        | 99213        | 99213   | 99213         | 99214   |
| 99214                          | 99214 | 99213    | 99213     | 99214       | 99213      | 99214        | 99214        | 99214   | 99214         | 99213   |
| 99212                          | T1015 | 90834    | S5145     | 99212       | Y9435      | 99215        | 99215        | T1015   | G0431         | G0156   |
| 96110                          | 96372 | 92508    | S5140     | 82055       | 99214      | 99212        | 36415        | H2000   | 81005         | 96110   |
| 90460                          | 99215 | 99212    | T2016     | G0431       | Y9433      | T1015        | 99212        | H0020   | 99211         | G0154   |
| 99215                          | 99212 | 90837    | T2020     | 82570       | S9122      | 99499        | 90834        | S9122   | G0434         | 99215   |
| 90834                          | 36415 | 99203    | 36415     | 99215       | Z5008      | 99203        | 99203        | G0434   | 81025         | 99212   |
| 99203                          | 99203 | 90832    | 99215     | 99203       | 99215      | G0396        | 90837        | 80104   | 99212         | S0316   |
| 99204                          | 96110 | 99215    | T2015     | 90460       | 99212      | 99204        | 85025        | 99211   | 82055         | 94760   |
| 99211                          | 80102 | 36415    | S0281     | 36415       | T1015      | 80104        | 99202        | 99212   | 99203         | 99203   |

*Notes.* Behavioral health conditions include both mental health conditions and substance use disorders.

E&M codes 99213 and 99214 have been highlighted in gray to show that these E&M codes are in the top 10 of all procedure codes used by both psychiatrists and primary care physicians in all states.

Comparison of reimbursement rates for facility claims submitted by psychiatrists versus primary care physicians, 2014

| State<br>E&M Code    | Psychiatrists |             |            | Primary Care Physicians |             |            | P Value |
|----------------------|---------------|-------------|------------|-------------------------|-------------|------------|---------|
|                      | N             | Mean (SD)   | [Min, Max] | N                       | Mean (SD)   | [Min, Max] |         |
| <b>Georgia</b>       |               |             |            |                         |             |            |         |
| 99213                | 906           | 29.3 (7.5)  | [8, 210]   | 716                     | 60.6 (17.8) | [27, 164]  | 0.00    |
| 99214                | 342           | 50.1 (35.8) | [17, 519]  | 513                     | 89.4 (25.0) | [41, 132]  | 0.00    |
| <b>Idaho</b>         |               |             |            |                         |             |            |         |
| 99213                | 43            | 24.9 (17.5) | [2, 57]    | 132                     | 34.5 (13.2) | [1, 49]    | 0.00    |
| 99214                | 45            | 52.9 (20.0) | [1, 61]    | 125                     | 57.0 (13.9) | [1, 61]    | 0.20    |
| <b>Michigan</b>      |               |             |            |                         |             |            |         |
| 99213                | 312           | 18.9 (3.1)  | [2, 20]    | 1,710                   | 30.0 (16.4) | [2, 54]    | 0.00    |
| 99214                | 239           | 30.2 (5.7)  | [2, 34]    | 1,149                   | 50.9 (25.6) | [2, 86]    | 0.00    |
| <b>Minnesota</b>     |               |             |            |                         |             |            |         |
| 99213                | 3,141         | 51.7 (13.7) | [1, 342]   | 2,165                   | 61.5 (55.9) | [2, 342]   | 0.00    |
| 99214                | 5,190         | 77.5 (27.5) | [1, 342]   | 1,452                   | 89.1 (50.6) | [9, 342]   | 0.00    |
| <b>Mississippi</b>   |               |             |            |                         |             |            |         |
| 99213                | 440           | 43.3 (3.8)  | [3, 61]    | 872                     | 48.7 (1.7)  | [16, 49]   | 0.00    |
| 99214                | 272           | 66.5 (7.1)  | [19, 68]   | 1,163                   | 75.7 (2.7)  | [17, 101]  | 0.00    |
| <b>New Jersey</b>    |               |             |            |                         |             |            |         |
| 99213                | 3,591         | 26.4 (8.9)  | [7, 45]    | 149                     | 35.3 (24.9) | [20, 84]   | 0.00    |
| 99214                | 1,051         | 41.8 (22.6) | [20, 71]   | 73                      | 56.1 (47.1) | [20, 119]  | 0.01    |
| <b>Vermont</b>       |               |             |            |                         |             |            |         |
| 99213                | 1,880         | 41.0 (0.9)  | [4, 42]    | 1,198                   | 61.3 (16.6) | [9, 93]    | 0.00    |
| 99214                | 928           | 62.1 (6.2)  | [5, 135]   | 1,469                   | 95.7 (24.4) | [26, 107]  | 0.00    |
| <b>West Virginia</b> |               |             |            |                         |             |            |         |
| 99213                | 6,471         | 49.1 (10.5) | [2, 545]   | 1,080                   | 56.9 (10.6) | [3, 84]    | 0.00    |
| 99214                | 994           | 67.5 (9.2)  | [5, 89]    | 266                     | 95.3 (15.5) | [9, 120]   | 0.00    |

Notes. E&M, Evaluation & Management; SD, standard deviation; Min, minimum; Max, maximum.

E&M 99213 is for established patient office visit (low to moderate severity); E&M 99214 is for established patient office visit (moderate severity).

Means, standard deviations, minimums, and maximums are all in dollars.

Pennsylvania, South Dakota, and Wyoming statistics are unavailable since there were fewer than 15 facility claims submitted for at least one of the provider types.
